# Supplementary material
Source: Springer Nature journal article supplement (https://www.springermedizin.de/resource/supplementary/12889_2005_314_MOESM1_ESM.pdf/9500932)

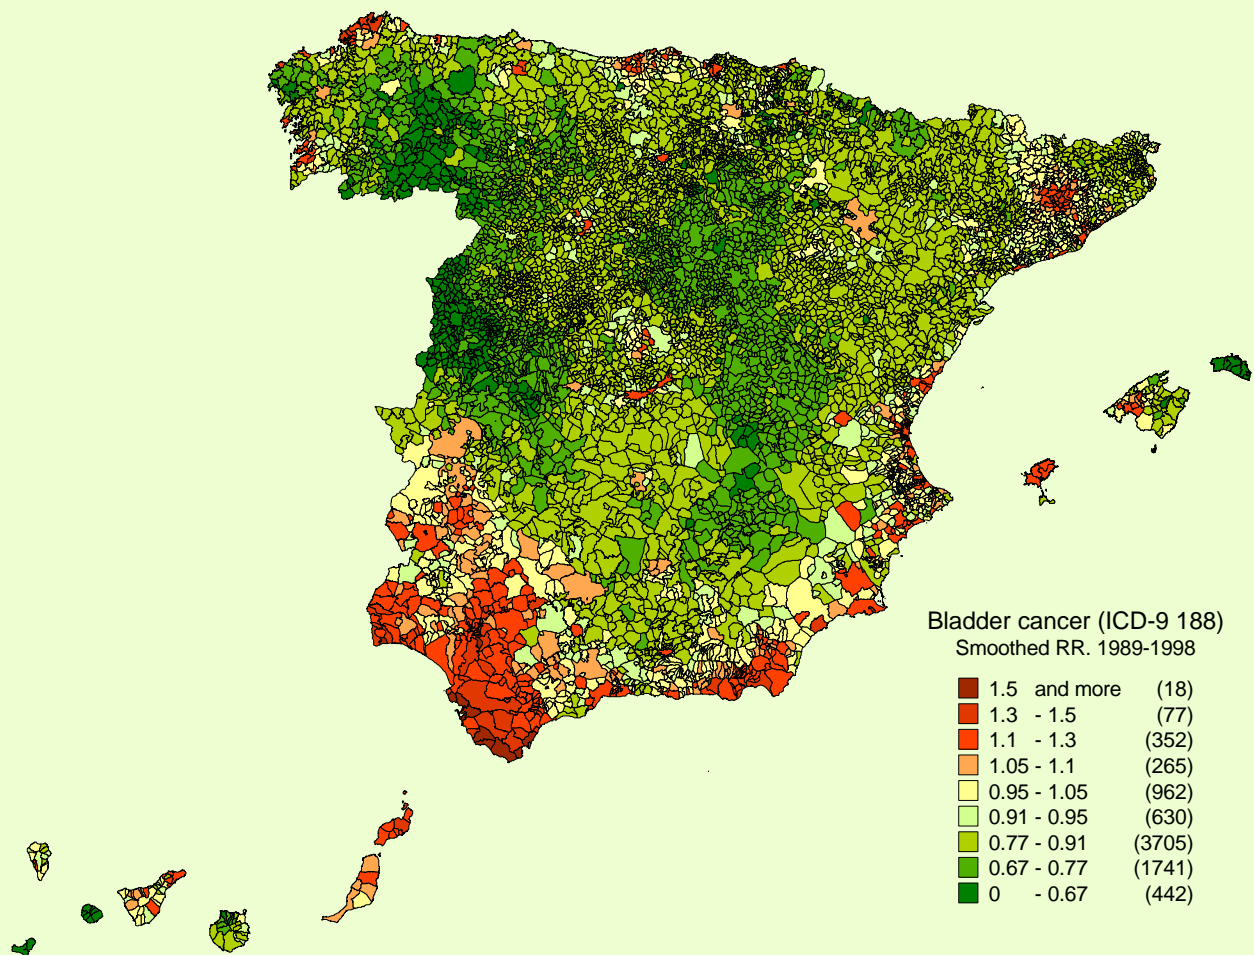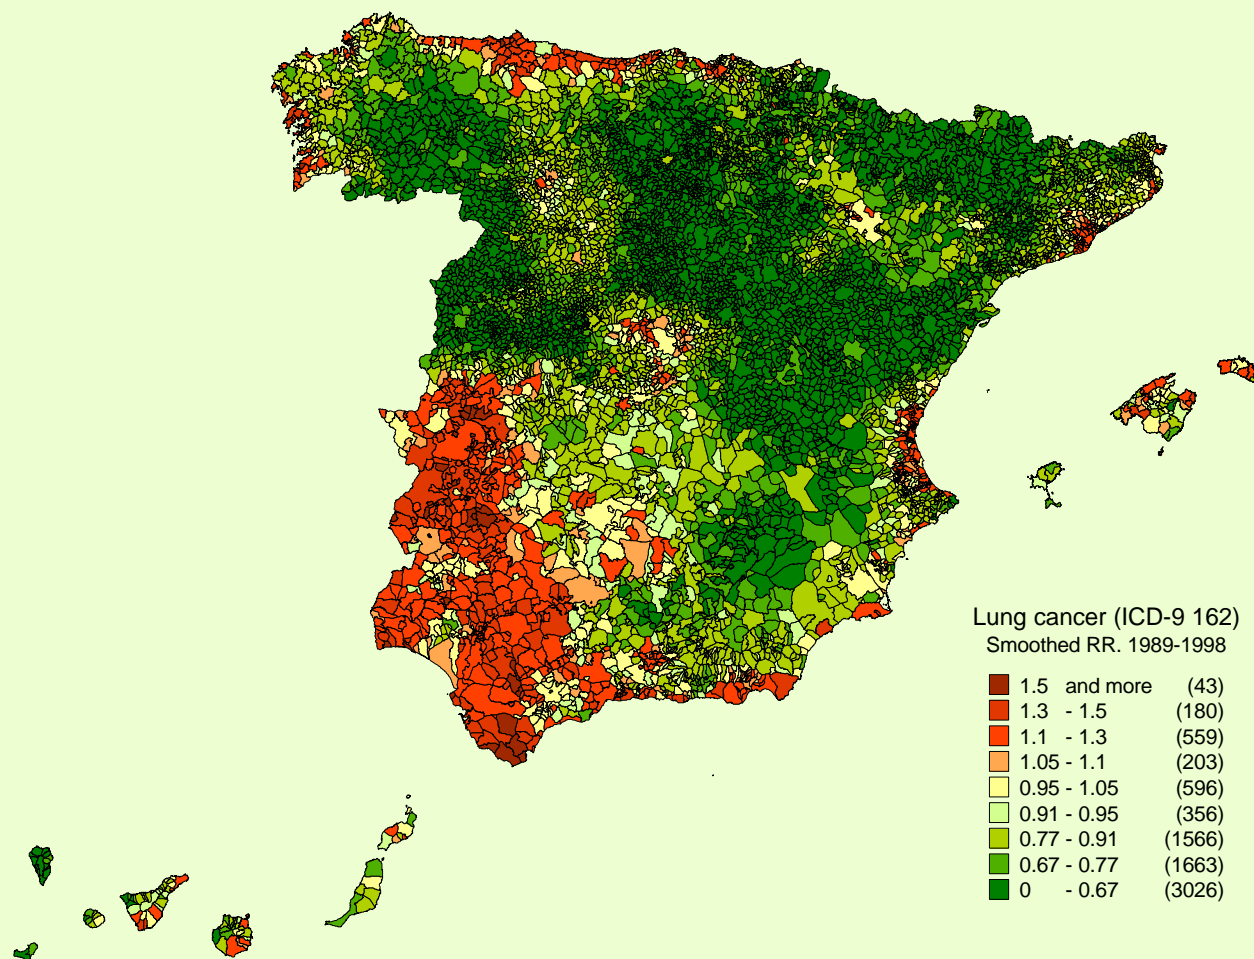

Supplement: MOESM1 [file 9500932]
